# Supplementary material for: Moderate Effects of the Arginine to Histidine R47H Variant of the Triggering Receptor Expressed on Myeloid Cells 2 (TREM2) on Bone Structure in Male and Female Mice: Insights from the Four Core Genotypes mice
Source: Research Square preprint supplement (doi:10.21203/rs.3.rs-9076483/v1), 2026-03-18
Supplement: Supplementary file 1 [file 69202276b9ac5b79a1b77ed7.pdf]

| Gonadal male |             |               |                |               |
|--------------|-------------|---------------|----------------|---------------|
| Figure       | Measurement | Sex           | TREM2 genotype | Interaction   |
|              |             | Chromosomes   |                |               |
|              |             | p value       | p value        | p value       |
| 2A           | Body weight | <b>0.0043</b> | 0.4964         | 0.3409        |
| 2B           | Total BMD   | <b>0.0196</b> | 0.3348         | 0.1343        |
|              | Femur BMD   | 0.0703        | 0.9879         | <b>0.0210</b> |
|              | Spine BMD   | <b>0.0385</b> | 0.2071         | 0.0779        |
| 2C           | Fat mass    | <b>0.0003</b> | 0.1783         | 0.5418        |
|              | %Fat mass   | <b>0.0004</b> | 0.3126         | 0.3117        |
|              | Lean mass   | <b>0.0414</b> | 0.1485         | 0.4550        |
|              | %Lean mass  | <b>0.0003</b> | 0.3208         | 0.3275        |

|    |             |                   |        |               |
|----|-------------|-------------------|--------|---------------|
| 3A | Body weight | <b>0.0001</b>     | 0.0870 | 0.3651        |
| 3B | Total BMD   | 0.0774            | 0.4447 | 0.2123        |
|    | Femur BMD   | 0.0978            | 0.9599 | 0.2001        |
|    | Spine BMD   | 0.4406            | 0.2553 | <b>0.0699</b> |
| 3C | Fat mass    | <b>&lt;0.0001</b> | 0.0742 | 0.8320        |
|    | %Fat mass   | <b>&lt;0.0001</b> | 0.1604 | 0.6959        |
|    | Lean mass   | <b>0.0624</b>     | 0.1725 | 0.1804        |
|    | %Lean mass  | <b>&lt;0.0001</b> | 0.1673 | 0.7063        |

|    |        |               |        |               |
|----|--------|---------------|--------|---------------|
| 4A | BV/TV  | 0.3624        | 0.2032 | <b>0.0172</b> |
|    | Tb.N   | 0.2520        | 0.6503 | 0.1149        |
|    | Tb.Th  | 0.4746        | 0.1187 | <b>0.0245</b> |
|    | Tb.Sp  | <b>0.0092</b> | 0.7398 | 0.1261        |
| 4B | MS/BS  | <b>0.0073</b> | 0.2565 | 0.8055        |
|    | MAR    | <b>0.0615</b> | 0.2147 | 0.2112        |
|    | BFR/BS | <b>0.0061</b> | 0.7739 | 0.3823        |

|    |       |               |        |               |
|----|-------|---------------|--------|---------------|
| 5A | BV/TV | 0.0990        | 0.5651 | <b>0.0191</b> |
|    | Tb.N  | 0.0726        | 0.3437 | <b>0.0137</b> |
|    | Tb.Th | 0.6736        | 0.4574 | 0.0931        |
|    | Tb.Sp | <b>0.0064</b> | 0.9333 | <b>0.0075</b> |
|    | vBMD  | 0.4510        | 0.4568 | 0.1872        |

|    |          |               |        |               |
|----|----------|---------------|--------|---------------|
| 6A | BA/TA    | <b>0.0014</b> | 0.4188 | 0.7440        |
|    | Ct.Th    | <b>0.0030</b> | 0.3345 | 0.1578        |
|    | CSA      | 0.4345        | 0.8584 | 0.2010        |
|    | Ma.Ar    | 0.0741        | 0.9503 | 0.3474        |
|    | Imax     | 0.8416        | 0.9719 | 0.0896        |
|    | vBMD     | 0.2264        | 0.4099 | <b>0.0131</b> |
| 6B | EcMS/BS  | 0.6843        | 0.1999 | 0.3328        |
|    | EcMAR    | 0.8618        | 0.4476 | 0.2699        |
|    | EcBFR/BS | 0.7304        | 0.4682 | 0.1698        |
| 6C | PsMS/BS  | 0.1529        | 0.3058 | 0.9958        |
|    | PsMAR    | 0.5124        | 0.3800 | 0.9635        |
|    | PsBFR/BS | 0.9635        | 0.5124 | 0.3800        |

|    |                    |               |        |        |
|----|--------------------|---------------|--------|--------|
| 7A | Yield force        | <b>0.0130</b> | 0.0983 | 0.8832 |
|    | Ultimate force     | <b>0.0162</b> | 0.7078 | 0.4350 |
|    | Total displacement | 0.8502        | 0.1837 | 0.2850 |
|    | Stiffness          | <b>0.0387</b> | 0.1349 | 0.8983 |
|    | Work to yield      | <b>0.0324</b> | 0.1457 | 0.8896 |
|    | yield stress       | <b>0.0357</b> | 0.2826 | 0.7366 |
|    | Ultimate stress    | <b>0.0024</b> | 0.9903 | 0.9843 |
|    | Total strain       | 0.8014        | 0.2001 | 0.2502 |
|    | Modulus            | <b>0.0438</b> | 0.3026 | 0.5355 |
|    | Failure stress     | 0.1545        | 0.0743 | 0.8643 |

| Gonadal female |             |               |                |             |
|----------------|-------------|---------------|----------------|-------------|
| Figure         | Measurement | Sex           | TREM2 genotype | Interaction |
|                |             | Chromosomes   |                |             |
|                |             | p value       | p value        | p value     |
| 2D             | Body weight | 0.6421        | 0.5271         | 0.9561      |
| 2E             | Total BMD   | <b>0.0095</b> | 0.8408         | 0.7958      |
|                | Femur BMD   | <b>0.0002</b> | 0.7026         | 0.5357      |
|                | Spine BMD   | <b>0.0191</b> | 0.5119         | 0.5669      |
| 2F             | Fat mass    | 0.1996        | 0.7408         | 0.4856      |
|                | %Fat mass   | 0.1232        | 0.9862         | 0.3937      |
|                | Lean mass   | 0.9402        | 0.1615         | 0.8058      |
|                | %Lean mass  | 0.1022        | 0.9586         | 0.4138      |

|    |             |               |        |        |
|----|-------------|---------------|--------|--------|
| 3D | Body weight | 0.3206        | 0.9900 | 0.7960 |
| 3E | Total BMD   | 0.1037        | 0.8096 | 0.4724 |
|    | Femur BMD   | <b>0.0003</b> | 0.6602 | 0.6150 |
|    | Spine BMD   | 0.3840        | 0.9478 | 0.8122 |
| 3F | Fat mass    | 0.6467        | 0.5713 | 0.2520 |
|    | %Fat mass   | 0.9281        | 0.5638 | 0.2098 |
|    | Lean mass   | <b>0.0700</b> | 0.6582 | 0.7449 |
|    | %Lean mass  | 0.9788        | 0.5536 | 0.1990 |

|    |        |               |        |        |
|----|--------|---------------|--------|--------|
| 4C | BV/TV  | <b>0.0270</b> | 0.6888 | 0.7663 |
|    | Tb.N   | <b>0.0162</b> | 0.7487 | 0.6637 |
|    | Tb.Th  | 0.7880        | 0.6376 | 0.1859 |
|    | Tb.Sp  | 0.1793        | 0.8778 | 0.2863 |
| 4D | MS/BS  | 0.2056        | 0.3405 | 0.6369 |
|    | MAR    | 0.3889        | 0.3330 | 0.0716 |
|    | BFR/BS | 0.2087        | 0.8674 | 0.2592 |

|    |       |               |               |        |
|----|-------|---------------|---------------|--------|
| 5B | BV/TV | 0.4507        | 0.4379        | 0.6300 |
|    | Tb.N  | 0.1390        | <b>0.0356</b> | 0.4360 |
|    | Tb.Th | 0.2753        | 0.7387        | 0.2035 |
|    | Tb.Sp | 0.4434        | <b>0.0101</b> | 0.5070 |
|    | vBMD  | <b>0.0549</b> | 0.8211        | 0.5316 |

|    |          |                   |        |        |
|----|----------|-------------------|--------|--------|
| 6D | BA/TA    | <b>&lt;0.0001</b> | 0.6426 | 0.8131 |
|    | Ct.Th    | <b>&lt;0.0001</b> | 0.3276 | 0.8506 |
|    | CSA      | <b>0.0431</b>     | 0.9860 | 0.9094 |
|    | Ma.Ar    | <b>&lt;0.0001</b> | 0.9490 | 0.7513 |
|    | Imax     | 0.2700            | 0.5973 | 0.6016 |
|    | vBMD     | <b>0.0065</b>     | 0.1538 | 0.6176 |
| 6E | EcMS/BS  | 0.6681            | 0.4292 | 0.9778 |
|    | EcMAR    | <b>0.0131</b>     | 0.3668 | 0.1538 |
|    | EcBFR/BS | <b>0.0370</b>     | 0.6415 | 0.6287 |
| 6F | PsMS/BS  | 0.1048            | 0.6333 | 0.3124 |
|    | PsMAR    | <b>0.0305</b>     | 0.9087 | 0.3484 |
|    | PsBFR/BS | <b>0.0298</b>     | 0.6851 | 0.7291 |

|    |                    |                   |               |               |
|----|--------------------|-------------------|---------------|---------------|
| 7B | Yield force        | <b>0.0002</b>     | 0.9632        | 0.1376        |
|    | Ultimate force     | <b>&lt;0.0001</b> | 0.1662        | 0.5732        |
|    | Total displacement | 0.3410            | <b>0.0631</b> | <b>0.0610</b> |
|    | Stiffness          | <b>0.0007</b>     | 0.6798        | 0.2684        |
|    | Work to yield      | <b>0.0198</b>     | 0.6289        | 0.4858        |
|    | yield stress       | 0.4015            | 0.8875        | 0.2187        |
|    | Ultimate stress    | <b>0.0003</b>     | 0.4822        | 0.9872        |
|    | Total strain       | 0.0876            | 0.6203        | 0.2779        |
|    | Modulus            | <b>0.0075</b>     | 0.7364        | 0.7767        |
|    | Failure stress     | <b>0.0096</b>     | 0.9958        | 0.3978        |
