# Supplementary material for: Moderate Effects of the Arginine to Histidine R47H Variant of the Triggering Receptor Expressed on Myeloid Cells 2 (TREM2) on Bone Structure in Male and Female Mice: Insights from the Four Core Genotypes mice
Source: Research Square preprint supplement (doi:10.21203/rs.3.rs-9076483/v1), 2026-03-18
Supplement: Supplementary file 2 [file 783e37bbaa91a02b017f63f1.pdf]

## gonadal male

| Supplementary Figure | Measurement | Sex                    |                           |                        |
|----------------------|-------------|------------------------|---------------------------|------------------------|
|                      |             | Chromosomes<br>p value | TREM2 genotype<br>p value | Interaction<br>p value |
| 1A                   | Body weight | 0.0503                 | 0.1185                    | 0.3510                 |
|                      | Total BMD   | 0.1531                 | 0.5530                    | 0.4241                 |
| 1B                   | Femur BMD   | 0.4457                 | 0.4450                    | 0.0260                 |
|                      | Spine BMD   | 0.8419                 | 0.2297                    | 0.7565                 |
| 1C                   | Fat mass    | 0.0838                 | 0.5972                    | 0.9630                 |
|                      | %Fat mass   | 0.2188                 | 0.7086                    | 0.7977                 |
|                      | Lean mass   | 0.7259                 | 0.8609                    | 0.1490                 |
|                      | %Lean mass  | 0.0057                 | 0.5561                    | 0.8351                 |
| 2A                   | CTX-1       | 0.4797                 | 0.4920                    | 0.4902                 |
|                      | P1NP        | 0.7862                 | 0.4663                    | 0.0692                 |

|                       |                                 |         |        |        |
|-----------------------|---------------------------------|---------|--------|--------|
| 3 (total weight in g) | Extensor digitorum longus (EDL) | 0.5870  | 0.3309 | 0.3327 |
|                       | Gastrocnemius                   | 0.1217  | 0.0964 | 0.0695 |
|                       | Soleus                          | 0.2867  | 0.0104 | 0.6081 |
|                       | Tibialis anterior (TA)          | 0.6798  | 0.4974 | 0.0046 |
| 3 (mg/g body weight)  | Quadriceps                      | 0.1480  | 0.0314 | 0.0379 |
|                       | Extensor digitorum longus (EDL) | 0.2246  | 0.5500 | 0.2840 |
|                       | Gastrocnemius                   | 0.0017  | 0.3300 | 0.7483 |
|                       | Soleus                          | 0.0141  | 0.0563 | 0.1061 |
| 4 (total weight in g) | Tibialis anterior (TA)          | 0.0004  | 0.9710 | 0.4385 |
|                       | Quadriceps                      | 0.0085  | 0.1242 | 0.3234 |
|                       | Brain                           | 0.4826  | 0.2761 | 0.0028 |
|                       | Heart                           | 0.3971  | 0.2662 | 0.6862 |
| 4 (mg/g body weight)  | Kidney                          | 0.0295  | 0.5287 | 0.2460 |
|                       | Spleen                          | <0.0001 | 0.1742 | 0.0312 |
|                       | Liver                           | 0.3827  | 0.2645 | 0.4497 |
|                       | Brain                           | 0.0011  | 0.1524 | 0.0378 |
| 4 (mg/g body weight)  | Heart                           | 0.0596  | 0.8871 | 0.5044 |
|                       | Kidney                          | 0.1547  | 0.2373 | 0.6129 |
|                       | Spleen                          | <0.0001 | 0.4058 | 0.1909 |
|                       | Liver                           | 0.1370  | 0.9157 | 0.2496 |

## gonadal female

| Supplementary Figure | Measurement | Sex                    |                           |                        |
|----------------------|-------------|------------------------|---------------------------|------------------------|
|                      |             | Chromosomes<br>p value | TREM2 genotype<br>p value | Interaction<br>p value |
| 1D                   | Body weight | 0.0361                 | 0.2171                    | 0.4913                 |
|                      | Total BMD   | 0.2067                 | 0.6417                    | 0.6370                 |
| 1E                   | Femur BMD   | 0.4198                 | 0.3326                    | 0.5971                 |
|                      | Spine BMD   | 0.1783                 | 0.5818                    | 0.4567                 |
| 1F                   | Fat mass    | 0.1693                 | 0.5361                    | 0.0454                 |
|                      | %Fat mass   | 0.3405                 | 0.8422                    | 0.0250                 |
|                      | Lean mass   | 0.0281                 | 0.2064                    | 0.9185                 |
|                      | %Lean mass  | 0.5320                 | 0.6255                    | 0.0437                 |
| 2B                   | CTX-1       | 0.0005                 | 0.3399                    | 0.1956                 |
|                      | P1NP        | 0.3515                 | 0.1157                    | 0.3659                 |

|                       |                                 |         |        |        |
|-----------------------|---------------------------------|---------|--------|--------|
| 3 (total weight in g) | Extensor digitorum longus (EDL) | 0.7271  | 0.4467 | 0.0466 |
|                       | Gastrocnemius                   | 0.7313  | 0.2448 | 0.0778 |
|                       | Soleus                          | 0.6791  | 0.7183 | 0.7581 |
|                       | Tibialis anterior (TA)          | 0.0627  | 0.2739 | 0.2493 |
| 3 (mg/g body weight)  | Quadriceps                      | 0.4614  | 0.4620 | 0.0053 |
|                       | Extensor digitorum longus (EDL) | 0.9898  | 0.5387 | 0.0827 |
|                       | Gastrocnemius                   | 0.6733  | 0.6500 | 0.2238 |
|                       | Soleus                          | 0.3888  | 0.4377 | 0.3105 |
| 4 (total weight in g) | Tibialis anterior (TA)          | 0.1986  | 0.5138 | 0.3340 |
|                       | Quadriceps                      | 0.5141  | 0.5492 | 0.0390 |
|                       | Brain                           | 0.8397  | 0.2515 | 0.5928 |
|                       | Heart                           | 0.2719  | 0.7632 | 0.3356 |
| 4 (mg/g body weight)  | Kidney                          | 0.0342  | 0.9172 | 0.3358 |
|                       | Spleen                          | <0.0001 | 0.6057 | 0.1396 |
|                       | Liver                           | 0.1820  | 0.5977 | 0.1060 |
|                       | Brain                           | 0.8978  | 0.3407 | 0.5656 |
| 4 (mg/g body weight)  | Heart                           | 0.4040  | 0.6444 | 0.5824 |
|                       | Kidney                          | 0.1880  | 0.7269 | 0.6080 |
|                       | Spleen                          | <0.0001 | 0.5428 | 0.1095 |
|                       | Liver                           | 0.3190  | 0.9806 | 0.0248 |
