# Supplementary material for: Moderate Effects of the Arginine to Histidine R47H Variant of the Triggering Receptor Expressed on Myeloid Cells 2 (TREM2) on Bone Structure in Male and Female Mice: Insights from the Four Core Genotypes mice
Source: Research Square preprint supplement (doi:10.21203/rs.3.rs-9076483/v1), 2026-03-18
Supplement: Supplementary file 3 [file ff3b4ffb15d55e6dab48a2ab.docx]

**Supplementary Legends**

**Supplementary Figure 1. Chromosomal sex and TREM2 genotype interaction affected body composition changes from 4- to 5.5 months.**

Body weight **(A**,**D)**, BMD **(B***,***E)** andbody composition **(C**,**F)** were measured in live animals by Dxa/Piximus at 4 and 5.5 months of age in gonadal male (**A-C**) and female (**D-F**) mice. Percent change was calculated and plotted. Box boundaries indicate 25th to 75th percentile, the horizontal lines correspond to the median, vertical lines indicate minimum to maximum, and each dot corresponds to an individual sample. Two-way ANOVA, with chromosomal sex and TREM2 genotype as the 2 variables, is shown in **Supplementary Table 2**. Lines indicate pairwise comparisons (Tukey’s multiple comparison test) with p values < 0.073. N=8-11/group.

**Supplementary Figure 2. Bone resorption markers are affected by chromosomal sex in gonadal female mice.**

Circulating levels of the bone resorption marker, CTX-1) and the bone formation marker P1NP, were measured in sera obtained from 5.5-month-old gonadal males (**A**) and female (**B**) mice. Box boundaries indicate 25th to 75th percentile, the horizontal lines correspond to the median, vertical lines indicate minimum to maximum, and each dot corresponds to an individual sample. Two-way ANOVA, with chromosomal sex and TREM2 genotype as the 2 variables, is shown in **Supplementary Table 2**.Lines indicate pairwise comparisons (Tukey’s multiple comparison test) with p values < 0.073. N=6-13/group.

**Supplementary Figure 3. Chromosomal sex and TREM2 genotypes differentially affect skeletal muscle weight in gonadal males and females.**

The weights of the shown skeletal muscles were measured following tissue collection. The skeletal muscles were later corrected by body weight (mg/g) for both gonadal males (**A**) and gonadal females (**B**) at 5.5 months of age. Box boundaries indicate 25th to 75th percentile, the horizontal lines correspond to the median, vertical lines indicate minimum to maximum, and each dot corresponds to an individual sample. Two-way ANOVA, with chromosomal sex and TREM2 genotype as the 2 variables, is shown in **Supplementary Table 2**. Lines indicate pairwise comparisons (Tukey’s multiple comparison test) with p values < 0.073. N=8-11/group.

**Supplementary Figure 4. Chromosomal sex effects persist in spleen after normalizing to body weight for both gonadal sexes.**

The weights of the shown organs were measured following tissue collection. The organs were later corrected by body weight (mg/g) for both gonadal males (**A**) and females (**B**) at 5.5 months of age. Box boundaries indicate 25th to 75th percentile, the horizontal lines correspond to the median, vertical lines indicate minimum to maximum, and each dot corresponds to an individual sample. Two-way ANOVA, with chromosomal sex and TREM2 genotype as the 2 variables, is shown in **Supplementary Table 2**. Lines indicate pairwise comparisons (Tukey’s multiple comparison test) with p values < 0.073. N=8-11/group.

**Supplementary Table Legends**

**Supplementary Table 1. P values for two-way ANOVA analyses with chromosomal sex and TREM2 genotype and their interactions.**

p values calculated by two-way ANOVA are displayed on the table with each gonadal sex separated for **Figures 2-8**. p values <0.05 are indicated in bold text, and tendency towards significan p values (0.073-0.050) are highlighted in green ■.

**Supplementary Table 2. Statistical p values for supplementary figures (two-way ANOVA)**

p values calculated through two-way ANOVA are displayed on the table with each gonadal sex separated for **Supplementary Figures 1-4**. p. p values <0.05 are indicated in bold text, and tendency towards significan p values (0.073-0.050) are highlighted in green ■.
